# Supplementary material for: The Influence of Social Supports on Graduate Student Persistence in Biomedical Fields
Source: Atypon-hosted journal article supplement (doi:10.1187/cbe.19-01-0029), 2019-08-23
Supplement: combinedsupmats.pdf [file combinedsupmats.pdf]

# Supplemental Material

*CBE—Life Sciences Education*

Estrada *et al.*

**Supplemental Tables 1. T-test results.**

|                                                |                             | Levene's Test for Equality of Variances |      | t-test for Equality of Means |        |                 |                 |                       |                                           |         |
|------------------------------------------------|-----------------------------|-----------------------------------------|------|------------------------------|--------|-----------------|-----------------|-----------------------|-------------------------------------------|---------|
|                                                |                             | F                                       | Sig. | t                            | df     | Sig. (2-tailed) | Mean Difference | Std. Error Difference | 95% Confidence Interval of the Difference |         |
|                                                |                             |                                         |      |                              |        |                 |                 |                       | Lower                                     | Upper   |
| Year Born                                      | Equal variances assumed     | .207                                    | .650 | .696                         | 99     | .488            | .86047          | 1.23664               | -1.59329                                  | 3.31424 |
|                                                | Equal variances not assumed |                                         |      | .691                         | 92.752 | .491            | .86047          | 1.24554               | -1.61301                                  | 3.33395 |
| Completion Year                                | Equal variances assumed     | 0.009                                   | .926 | -1.880                       | 99     | .063            | -.45099         | .23987                | -0.92694                                  | .02497  |
|                                                | Equal variances not assumed |                                         |      | -1.861                       | 91.184 | .066            | -.45099         | .24234                | -0.93234                                  | .03037  |
| Gender                                         | Equal variances assumed     | 2.339                                   | .129 | .386                         | 99     | .701            | .04111          | .10659                | -.17039                                   | .25261  |
|                                                | Equal variances not assumed |                                         |      | .394                         | 98.782 | .695            | .04111          | .10446                | -.16618                                   | .24839  |
| Marital Status                                 | Equal variances assumed     | 4.025                                   | .048 | 1.429                        | 99     | .156            | .29921          | .20937                | -.11623                                   | .71464  |
|                                                | Equal variances not assumed |                                         |      | 1.406                        | 87.748 | .163            | .29921          | .21281                | -.12372                                   | .72214  |
| Total student loans                            | Equal variances assumed     | 4.086                                   | .051 | -.618                        | 36     | .541            | -.76923         | 1.24563               | -3.29548                                  | 1.75702 |
|                                                | Equal variances not assumed |                                         |      | -.811                        | 35.784 | .422            | -.76923         | .94803                | -2.69232                                  | 1.15386 |
| Total debts                                    | Equal variances assumed     | 1.528                                   | .219 | -.708                        | 99     | .481            | -.39447         | .55707                | -1.49982                                  | .71089  |
|                                                | Equal variances not assumed |                                         |      | -.732                        | 94.986 | .466            | -.39447         | .53859                | -1.46370                                  | .67477  |
| Degree of difficulty in paying for basic needs | Equal variances assumed     | .007                                    | .932 | .112                         | 99     | .911            | .02134          | .19110                | -.35784                                   | .40053  |
|                                                | Equal variances not assumed |                                         |      | .112                         | 95.828 | .911            | .02134          | .19112                | -.35803                                   | .40072  |
| Instrumental Support                           | Equal variances assumed     | .313                                    | .577 | .328                         | 88     | .744            | .06102          | .18614                | -.30890                                   | .43094  |

|                            |                             |       |      |       |        |      |         |        |          |        |
|----------------------------|-----------------------------|-------|------|-------|--------|------|---------|--------|----------|--------|
|                            | Equal variances not assumed |       |      | .327  | 87.063 | .744 | .06102  | .18639 | -.30945  | .43148 |
| Psychosocial Support       | Equal variances assumed     | 3.054 | .084 | -.176 | 88     | .861 | -.03829 | .21766 | -.47085  | .39427 |
|                            | Equal variances not assumed |       |      | -.175 | 82.264 | .861 | -.03829 | .21874 | -.47342  | .39684 |
| Profession Network Support | Equal variances assumed     | .124  | .726 | .714  | 88     | .477 | .15860  | .22214 | -.28286  | .60006 |
|                            | Equal variances not assumed |       |      | .714  | 87.885 | .477 | .15860  | .22210 | -.28279  | .59998 |
| Family and Friend Support  | Equal variances assumed     | 1.352 | .248 | .646  | 99     | .520 | .11561  | .17886 | -.23928  | .47051 |
|                            | Equal variances not assumed |       |      | .657  | 98.999 | .513 | .11561  | .17607 | -.23374  | .46497 |
| Science Identity           | Equal variances assumed     | .204  | .652 | .691  | 90     | .492 | .11391  | .16491 | -.21372  | .44154 |
|                            | Equal variances not assumed |       |      | .680  | 79.704 | .498 | .11391  | .16745 | -.21934  | .44716 |
| Persistence                | Equal variances assumed     | .056  | .814 | -.780 | 90     | .437 | -.34988 | .44860 | -1.24110 | .54134 |
|                            | Equal variances not assumed |       |      | -.782 | 89.303 | .436 | -.34988 | .44730 | -1.23862 | .53886 |

**Supplemental Table 2. Chi-square results.**

**Attended a Professional Conference Chi-Square Tests**

|                    |     |       | Attended a Professional Conference |       | Total  |
|--------------------|-----|-------|------------------------------------|-------|--------|
|                    |     |       | No                                 | Yes   |        |
| If HU <sup>1</sup> | No  | Count | 28                                 | 18    | 46     |
|                    |     | %     | 60.9%                              | 39.1% | 100.0% |
|                    | Yes | Count | 35                                 | 20    | 55     |
|                    |     | %     | 63.6%                              | 36.4% | 100.0% |

<sup>1</sup> HU means Historically Underrepresented

|                                    | Value             | df | Asymptotic Significance (2-sided) | Exact Sig. (2-sided) | Exact Sig. (1-sided) |
|------------------------------------|-------------------|----|-----------------------------------|----------------------|----------------------|
| Pearson Chi-Square                 | .082 <sup>a</sup> | 1  | .775                              |                      |                      |
| Continuity Correction <sup>b</sup> | .006              | 1  | .937                              |                      |                      |
| Likelihood Ratio                   | .082              | 1  | .775                              |                      |                      |
| Fisher's Exact Test                |                   |    |                                   | .838                 | .468                 |
| Linear-by-Linear Association       | .081              | 1  | .776                              |                      |                      |
| N of Valid Cases                   | 101               |    |                                   |                      |                      |

a. 0 cells (0.0%) have expected count less than 5. The minimum expected count is 17.31.

b. Computed only for a 2x2 table

**Prepared a Scientific Manuscript Chi-Square Tests**

|                    |     |       | Prepared a Scientific Manuscript |       | Total  |
|--------------------|-----|-------|----------------------------------|-------|--------|
|                    |     |       | No                               | Yes   |        |
| If HU <sup>1</sup> | No  | Count | 20                               | 26    | 46     |
|                    |     | %     | 43.5%                            | 56.5% | 100.0% |
|                    | Yes | Count | 39                               | 16    | 55     |
|                    |     | %     | 70.9%                            | 29.1% | 100.0% |

<sup>1</sup> HU means Historically Underrepresented

|                                    | Value              | df | Asymptotic<br>Significance (2-sided) | Exact Sig.<br>(2-sided) | Exact Sig.<br>(1-sided) |
|------------------------------------|--------------------|----|--------------------------------------|-------------------------|-------------------------|
| Pearson Chi-Square                 | 7.759 <sup>a</sup> | 1  | .005                                 |                         |                         |
| Continuity Correction <sup>b</sup> | 6.671              | 1  | .010                                 |                         |                         |
| Likelihood Ratio                   | 7.830              | 1  | .005                                 |                         |                         |
| Fisher's Exact Test                |                    |    |                                      | .008                    | .005                    |
| Linear-by-Linear<br>Association    | 7.682              | 1  | .006                                 |                         |                         |
| N of Valid Cases                   | 101                |    |                                      |                         |                         |

a. 0 cells (0.0%) have expected count less than 5. The minimum expected count is 19.13.

b. Computed only for a 2x2 table

**Prepared a Grant Application Chi-Square Tests**

|                    |     |       | Prepared a Grant Application |       | Total  |
|--------------------|-----|-------|------------------------------|-------|--------|
|                    |     |       | No                           | Yes   |        |
| If HU <sup>1</sup> | No  | Count | 20                           | 26    | 46     |
|                    |     | %     | 43.5%                        | 56.5% | 100.0% |
|                    | Yes | Count | 32                           | 23    | 55     |
|                    |     | %     | 58.2%                        | 41.8% | 100.0% |

<sup>1</sup> HU means Historically Underrepresented

|                                    | Value              | df | Asymptotic<br>Significance (2-sided) | Exact Sig.<br>(2-sided) | Exact Sig. (1-<br>sided) |
|------------------------------------|--------------------|----|--------------------------------------|-------------------------|--------------------------|
| Pearson Chi-Square                 | 2.168 <sup>a</sup> | 1  | .141                                 |                         |                          |
| Continuity Correction <sup>b</sup> | 1.619              | 1  | .203                                 |                         |                          |
| Likelihood Ratio                   | 2.175              | 1  | .140                                 |                         |                          |
| Fisher's Exact Test                |                    |    |                                      | .165                    | .101                     |
| Linear-by-Linear<br>Association    | 2.147              | 1  | .143                                 |                         |                          |
| N of Valid Cases                   | 101                |    |                                      |                         |                          |

a. 0 cells (0.0%) have expected count less than 5. The minimum expected count is 22.32.

b. Computed only for a 2x2 table
